# Supplementary material
Source: Springer Nature journal article supplement (https://www.springermedizin.de/resource/supplementary/12885_2013_4433_MOESM1_ESM.pdf/9466258)
Supplement: MOESM1 [file 9466258]

| Months                                | 0          | 6            | 12               | 18 | 24 |
|---------------------------------------|------------|--------------|------------------|----|----|
| <b>EXERCISE GROUP</b>                 |            | Intervention | 1 year Follow-up |    |    |
| <b>EXERCISE + PSYCHO-SEXUAL GROUP</b> |            | Intervention | 1 year Follow-up |    |    |
| <b>USUAL CARE GROUP</b>               | Usual care | Intervention | 1 year Follow-up |    |    |
